# Supplementary material for: Matrix metalloproteinase-9 (MMP-9) and tissue inhibitor of metalloproteinases 1 (TIMP-1) are localized in the nucleus of retinal Müller glial cells and modulated by cytokines and oxidative stress
Source: PubMed Central journal article supplement (PMC8284794; doi:10.1371/journal.pone.0253915), 2021-07-16
Supplement: pone.0253915.s007.pdf [file pone.0253915.s007.pdf]

Fig 1 B

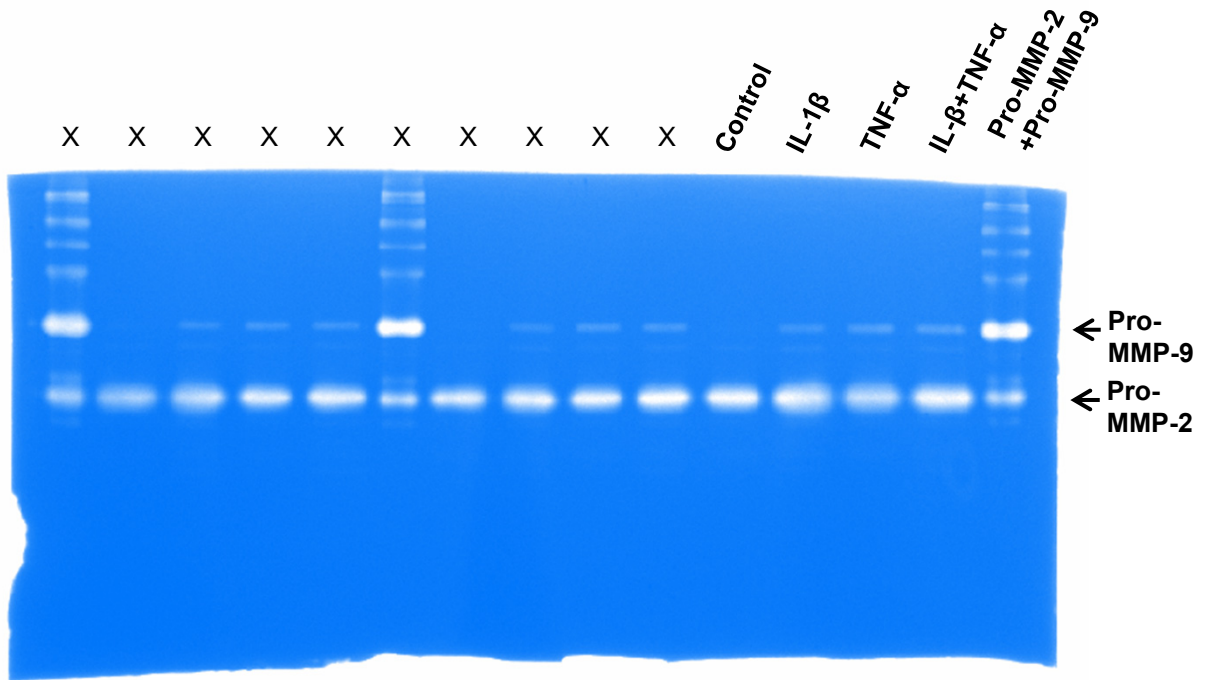

**Method:** SDS-PAGE gels were pre-stained with Coomassie Blue Stain were imaged by Bio-Rad Gel Doc XR+ Gel Documentation System. Images were captured by Bio-Rad Image Lab image acquisition and analysis software.

Fig 4 B

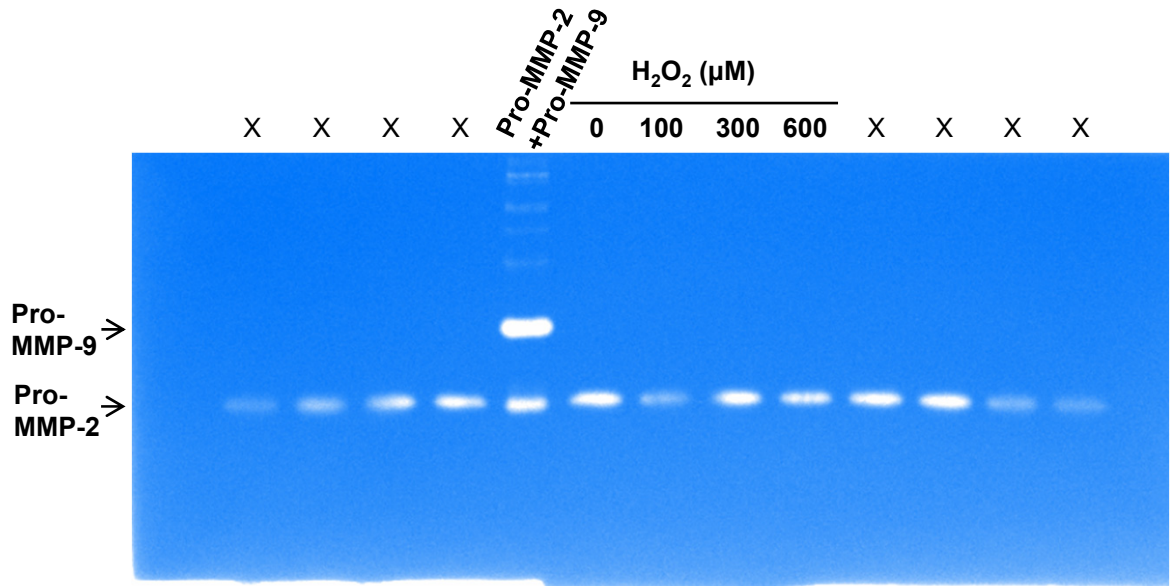

**Method:** SDS-PAGE gels were pre-stained with Coomassie Blue Stain were imaged by Bio-Rad Gel Doc XR+ Gel Documentation System. Images were captured by Bio-Rad Image Lab image acquisition and analysis software.

Fig 5 A

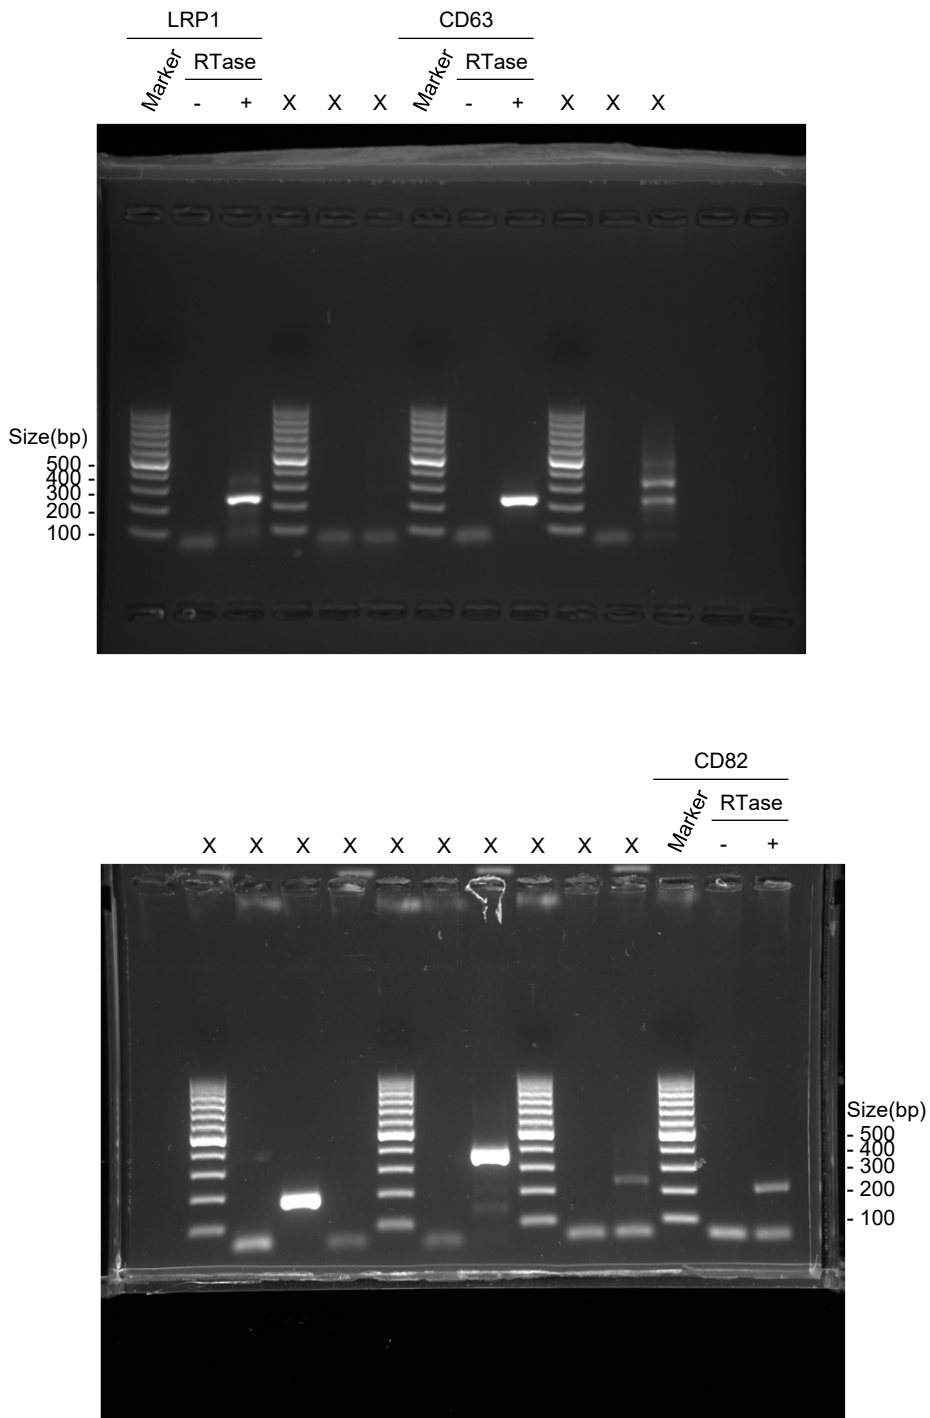

**Method:** Agarose gels pre-stained with GelRed® Nucleic Acid Gel Stain were imaged by Bio-Rad Gel Doc XR+ Gel Documentation System. Images were captured by Bio-Rad Image Lab image acquisition and analysis software.

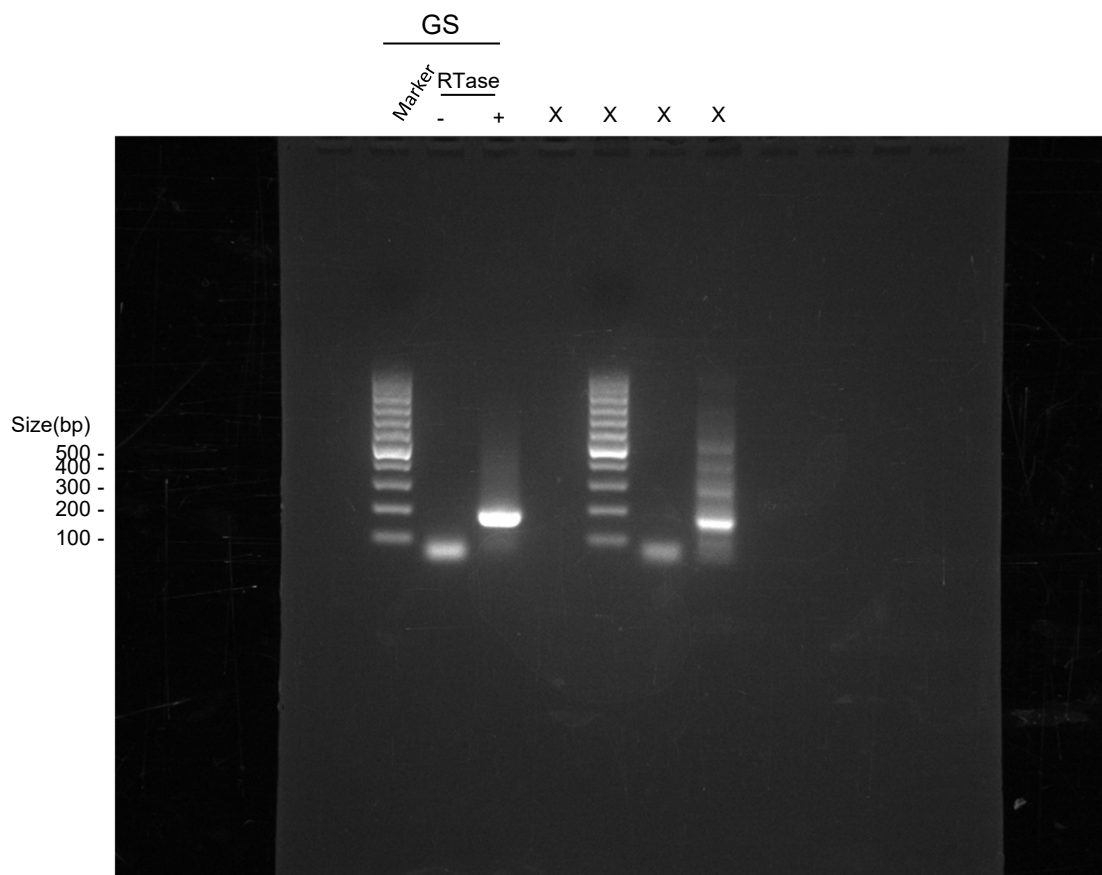

Method: Agarose gels pre-stained with GelRed® Nucleic Acid Gel Stain were imaged by Bio-Rad Gel Doc XR+ Gel Documentation System. Images were captured by Bio-Rad Image Lab image acquisition and analysis software.

# Supplemental Fig 1 A

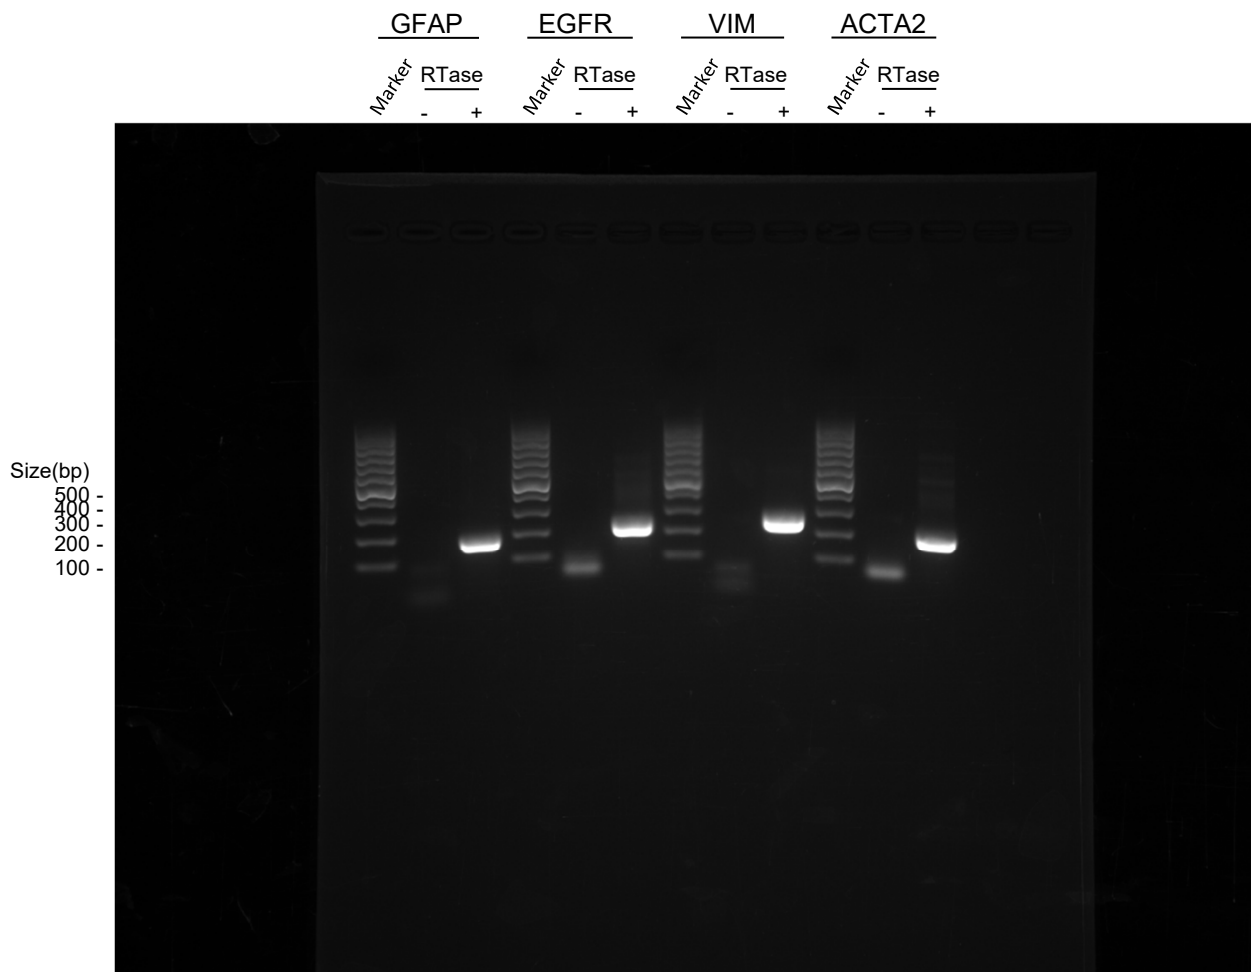

Method: Agarose gels pre-stained with GelRed® Nucleic Acid Gel Stain were imaged by Bio-Rad Gel Doc XR+ Gel Documentation System. Images were captured by Bio-Rad Image Lab image acquisition and analysis software.

TIMP-1

Marker RTase

- + X X X X X X X X

Size(bp)  
500 -  
400 -  
300 -  
200 -  
100 -

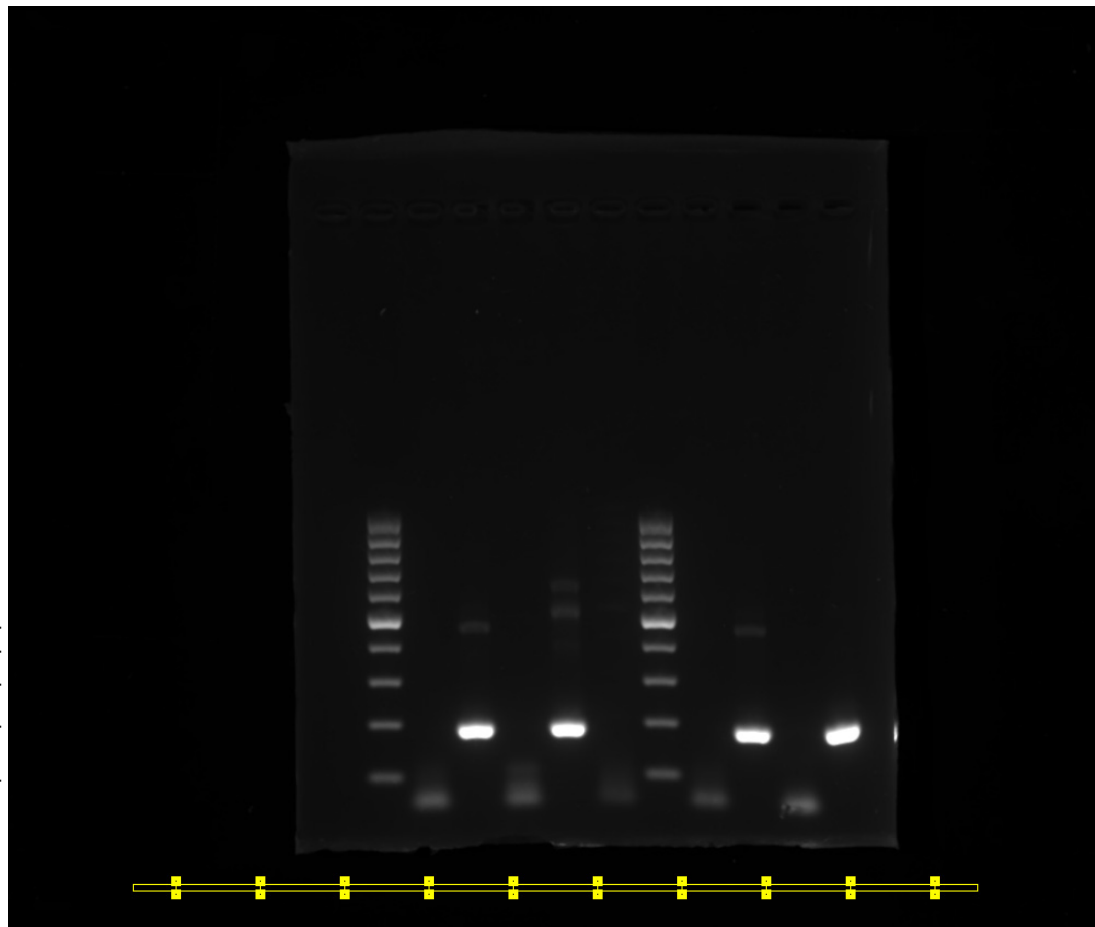

Method: Agarose gels pre-stained with GelRed® Nucleic Acid Gel Stain were imaged by Bio-Rad Gel Doc XR+ Gel Documentation System. Images were captured by Bio-Rad Image Lab image acquisition and analysis software.

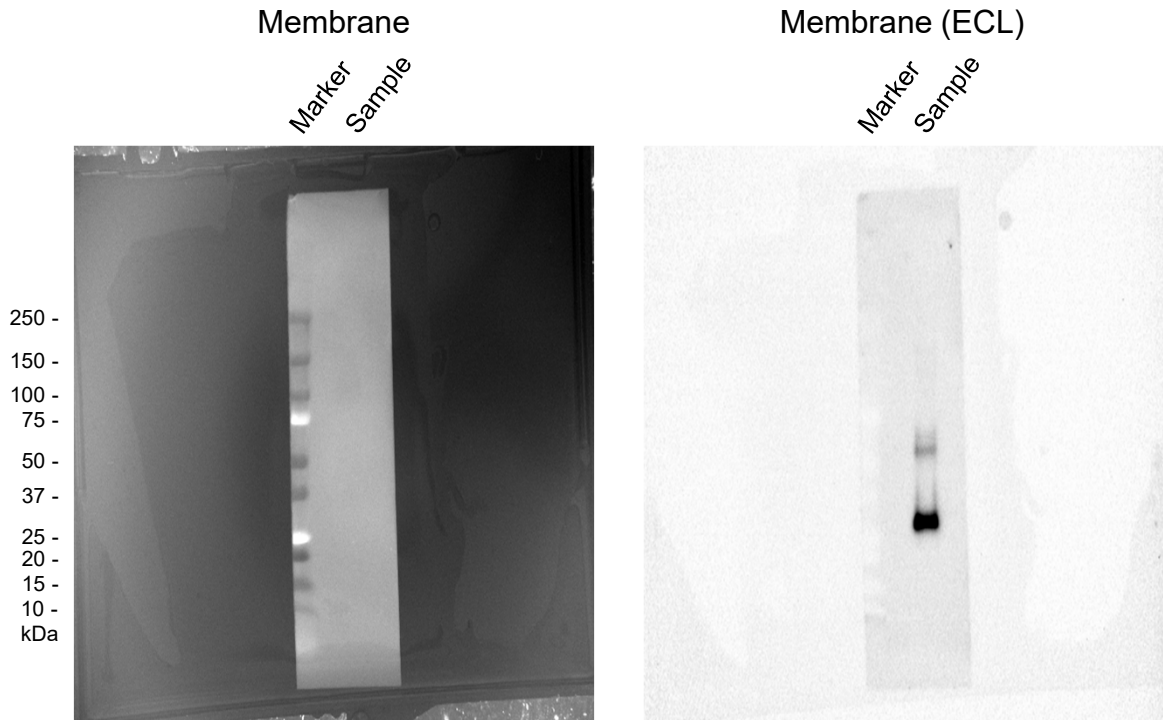

Method: PVDF membrane stained with anti-TIMP-1 antibody were immersed with ECL solution, then imaged by Bio-Rad Gel Doc XR+ Gel Documentation System. Images were captured by Bio-Rad Image Lab image acquisition and analysis software.

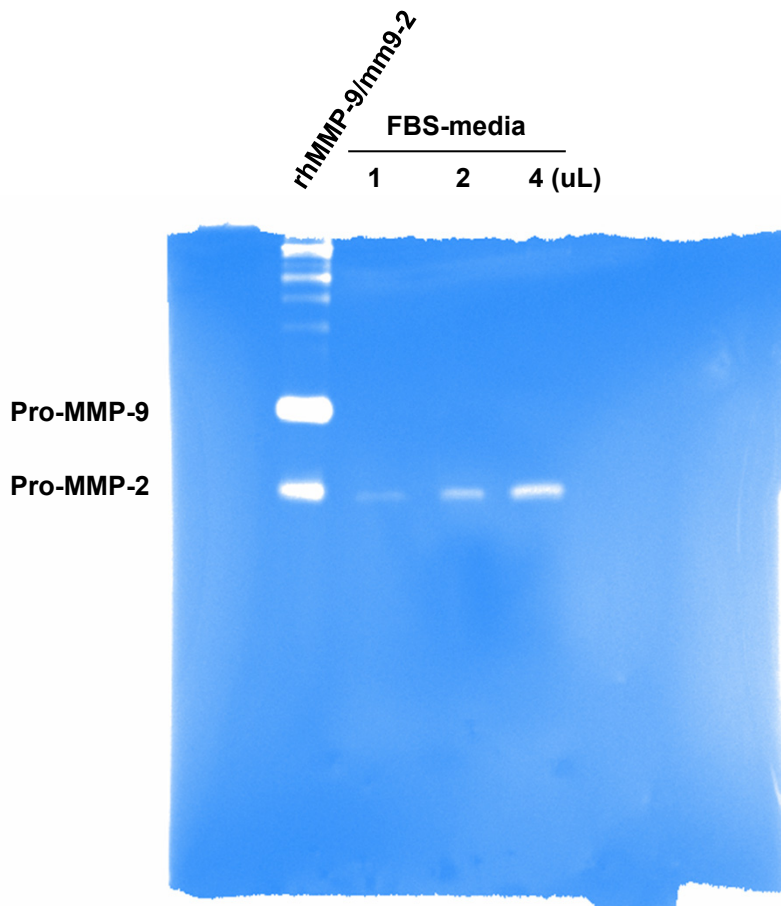

**Method:** SDS-PAGE gels were pre-stained with Coomassie Blue Stain were imaged by Bio-Rad Gel Doc XR+ Gel Documentation System. Images were captured by Bio-Rad Image Lab image acquisition and analysis software.
